# Supplementary material
Source: publisher figshare collection journal article supplement (https://acs.figshare.com/ndownloader/files/7788949)
Supplement: Supplementary file 1 [file 7788949]

## **SUPPORTING INFORMATION**

Thermo-Magneto-Responsive Dual Function Nanoparticles: An Approach for Magnetic

Entrapable-Releasable Chitosan

Chutamart Pitakchatwong<sup>†</sup>, Suwabun Chirachanchai<sup>\*,§,†</sup>

<sup>†</sup>*The Petroleum and Petrochemical College, Chulalongkorn University, Bangkok 10330,*

*Thailand*

<sup>§</sup>*Center for Petroleum, Petrochemicals, and Advanced Materials, Chulalongkorn University,*

*Bangkok 10330, Thailand*

<sup>\*</sup>Corresponding author

Chirachanchai, Suwabun, Professor,

The Petroleum and Petrochemical College

Chulalongkorn University

E-mail address: csuwabun@chula.ac.th.

Tel: (+66) 02-218-4134

Fax: (+66) 02-218-4134

**Scheme S1.** Schematic representation for synthesis of (A) water soluble chitosan (WCS), (B) PNIPAM-COOH, and (C) CSPNIPAM

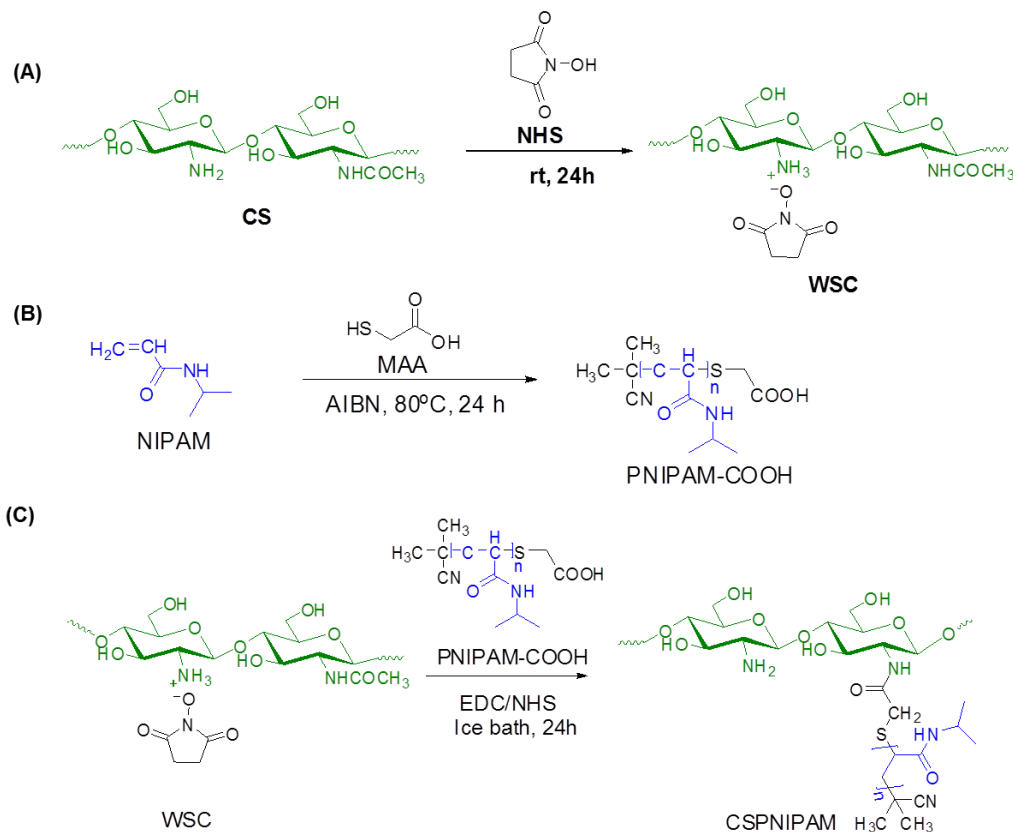

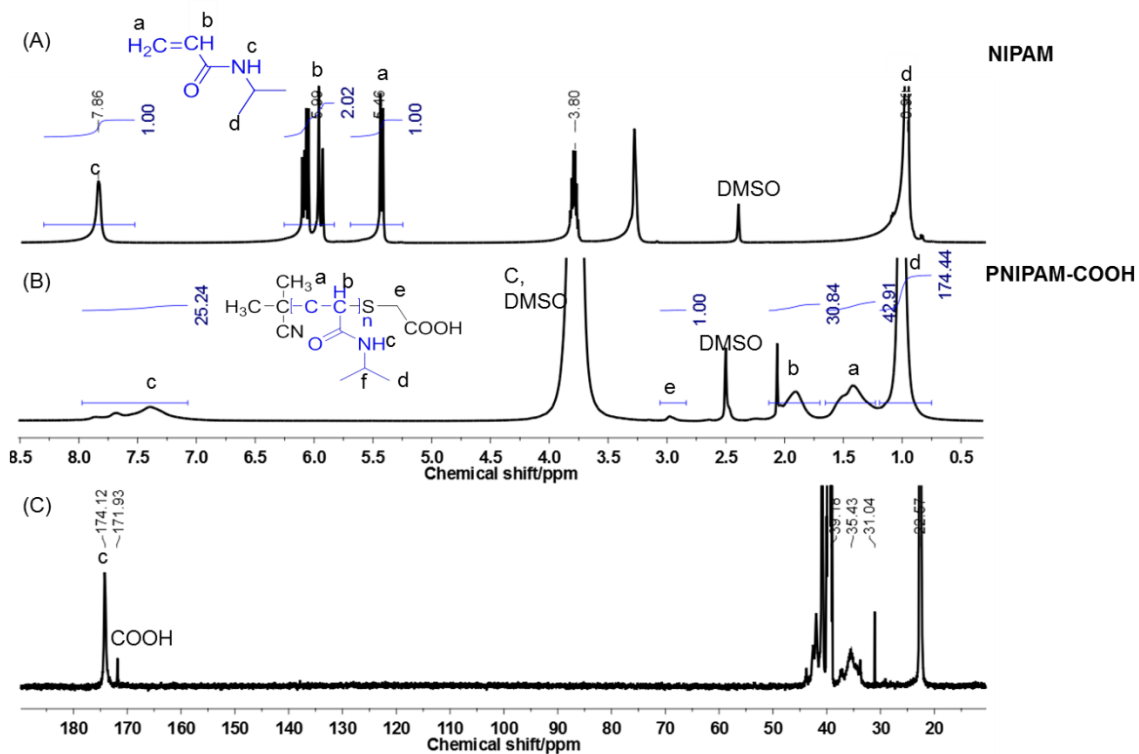

**Figure S1.** <sup>1</sup>H-NMR spectra of (A) NIPAM, (B) PNIPAM-COOH, and (C) <sup>13</sup>C-NMR spectrum of PNIPAM-COOH (500 MHz, DMSO).

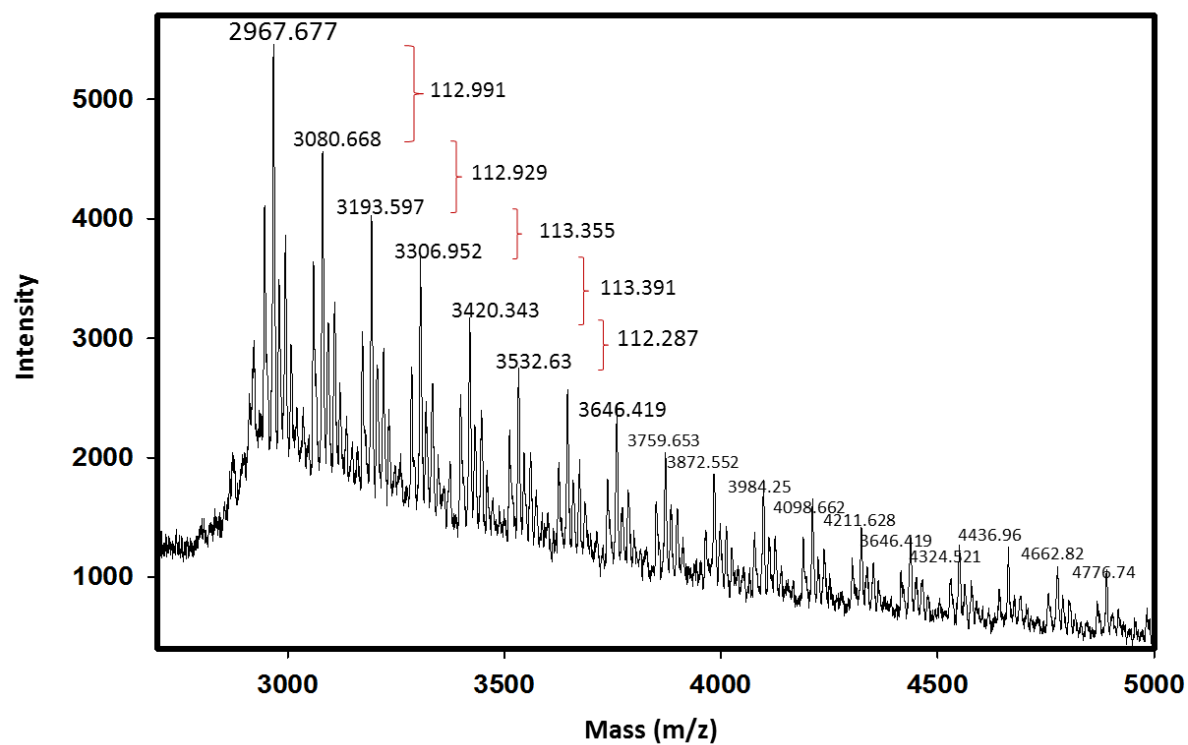

**Figure S2.** Degradation of PNIPAM-COOH evaluated by MALDI-TOF mass spectrometry.

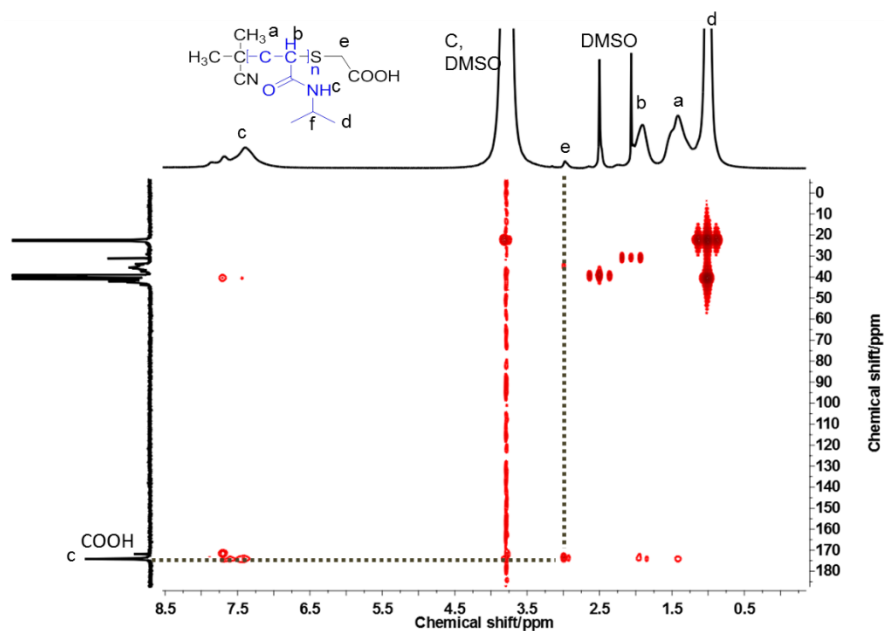

**Figure S3.** HMBC-2D NMR spectrum of PNIPAM-COOH.

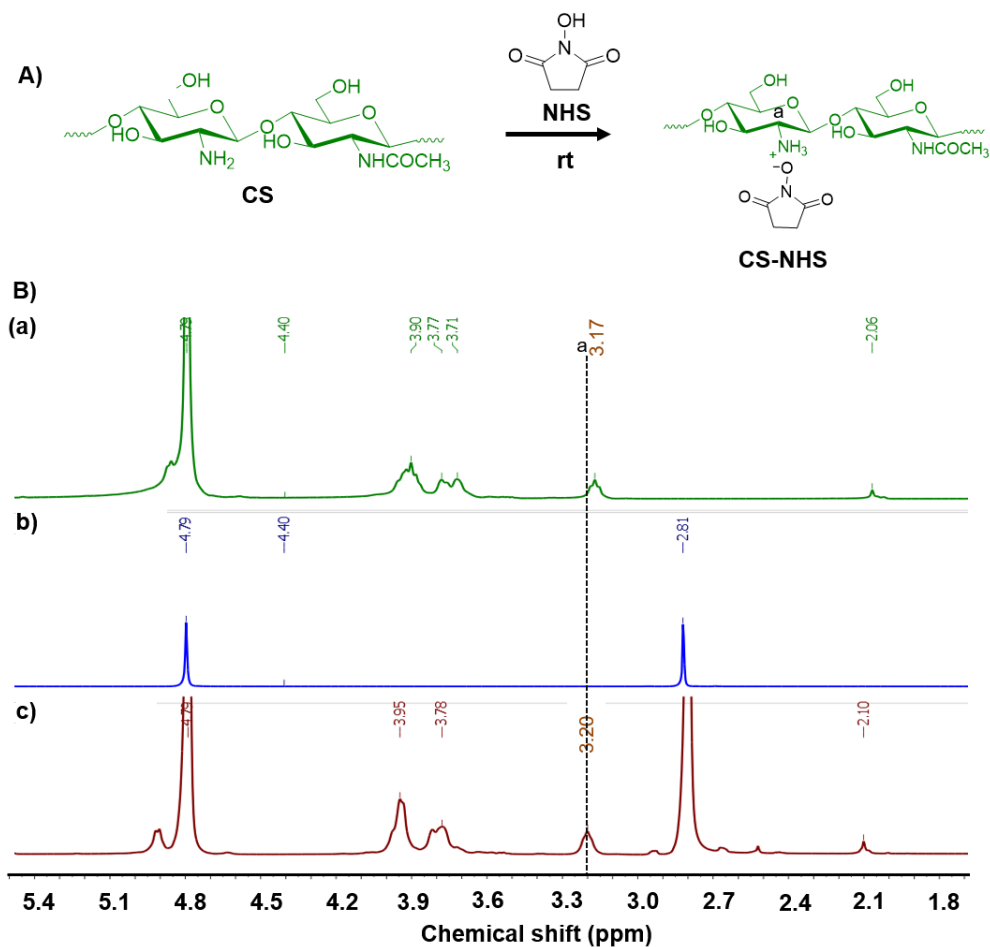

**Figure S4.** A) Complexation between CS and pristine NHS, and B) <sup>1</sup>H-NMR spectra of (a) CS, (b) pristine NHS, and (c) CS-NHS (1:3 molar ratio) (500 MHz, D<sub>2</sub>O).

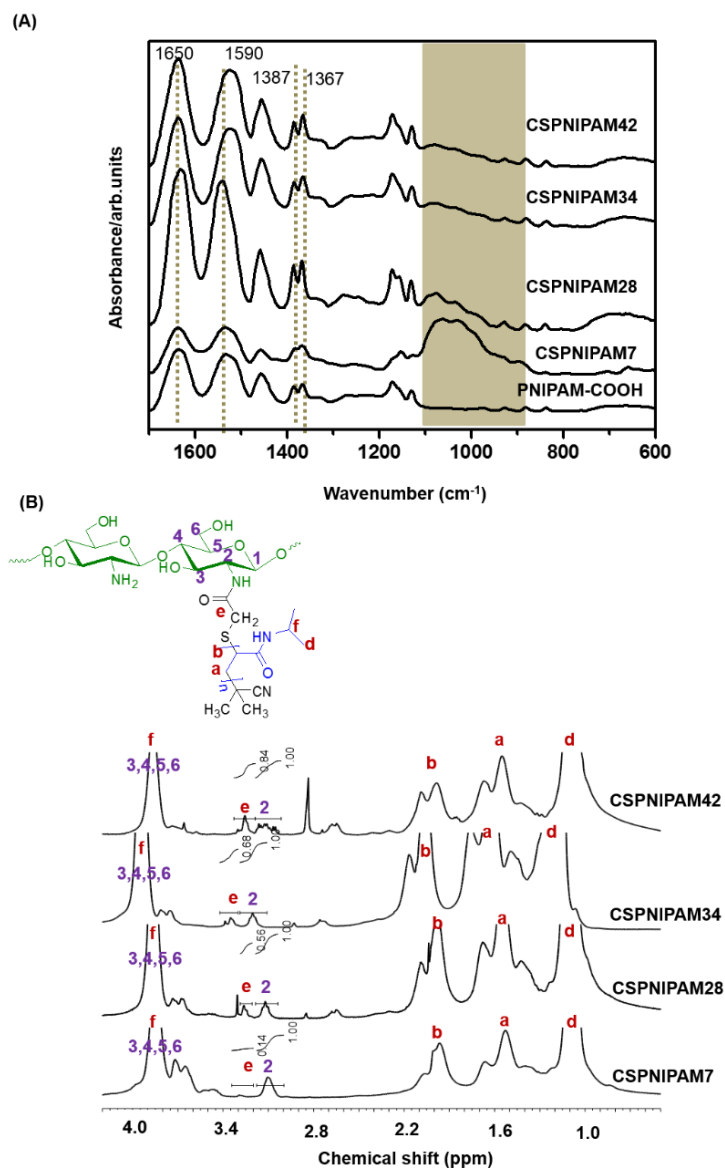

**Figure S5.** (A) FTIR analysis of CSPNIPAM in different %DS ( $M_n$  of PNIPAM 1000-2000). The shaded region represent the pyranose ring of chitosan, and dotted lines represent the methyl group of PNIPAM, N-H bending of chitosan, and carbonyl of amide, respectively, and (B)  $^1\text{H}$ -NMR spectra of the synthesized CSPNIPAM.

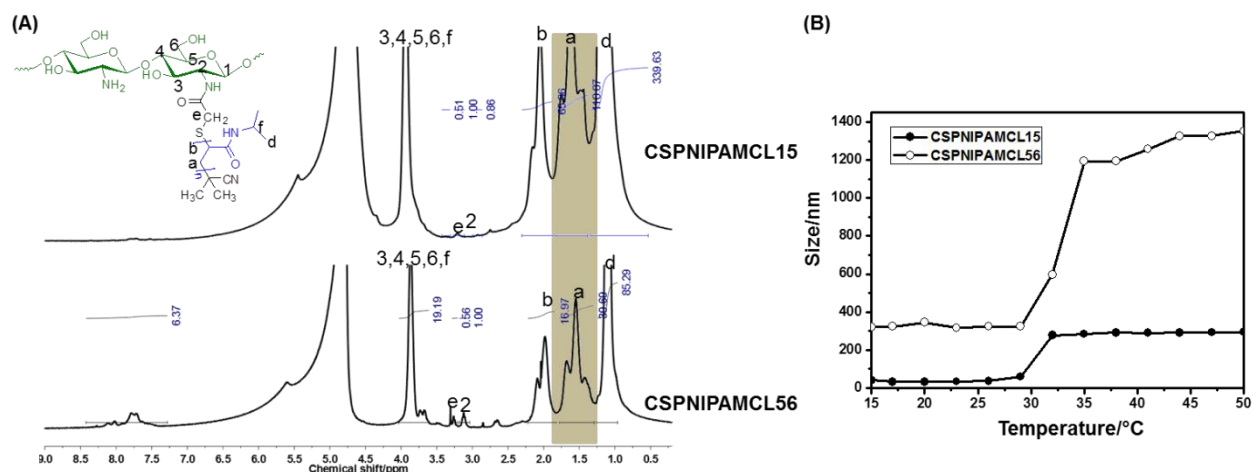

**Figure S6.** A)  $^1\text{H}$ -NMR spectra of the synthesized CSPNIPAM25 CL15 and CSPNIPAM25 CL56, and B) Temperature dependence of size of various chain lengths of CSPNIPAM25 by DLS: CSPNIPAM25 CL15 and CSPNIPAM25 CL56. The concentration of all samples were  $6 \text{ mg/mL}^{-1}$ .

**Table S1.** Calculation of HLB of CSPNIPAM

| Molar ratio of CS:PNIPAM-COOH | DS | CL | <i>Mh</i> of PNIPAM | <i>Mh</i> of CS | Total <i>Mh</i> | <i>M</i> of PNIPAM | <i>M</i> of CS | Total <i>M</i> | HLB <sup>a</sup> |
|-------------------------------|----|----|---------------------|-----------------|-----------------|--------------------|----------------|----------------|------------------|
| 1:1                           | 7  | 8  | 2,408               | 1,789           | 4,197           | 7,435.96           | 15,988         | 23,423.96      | 3.58             |
| 1:3                           | 28 | 17 | 20,468              | 2,356           | 22,824          | 58,260.16          | 15,652         | 73,912.16      | 6.16             |
| 1:5                           | 34 | 28 | 40,936              | 2,518           | 43,454          | 113,066.32         | 15,556         | 128,622.32     | 6.76             |
| 1:7                           | 42 | 11 | 19,866              | 2,734           | 22,600          | 58,873.92          | 15,428         | 74,301.92      | 6.08             |
| 1:3                           | 25 | 15 | 16,125              | 2,275           | 18,400          | 46,360             | 15,700         | 62,060         | 5.93             |
| 1:3                           | 25 | 56 | 60,200              | 2,275           | 62,475          | 162,349            | 15,700         | 178,049        | 7.02             |

<sup>a</sup> Calculation of HLB based on Griffen equation<sup>1</sup> (Eq 1.)

$$\frac{20 \times Mh}{M} = \frac{\text{wt\% hydrophile}}{5} \quad (1)$$

(where *Mh* is molecular mass of the hydrophilic portion of the molecule, and *M* is molecular mass of the whole molecule).

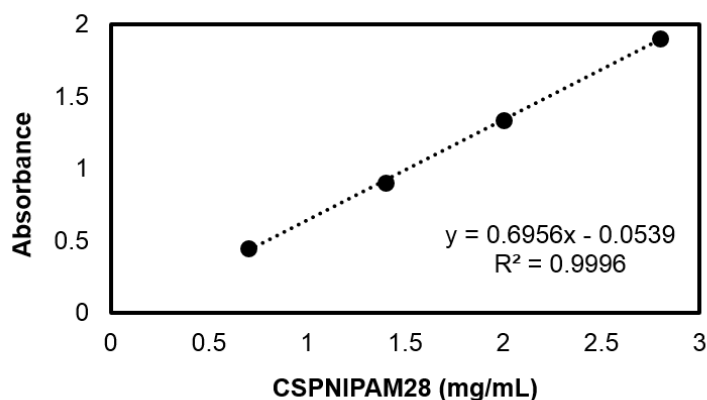

**Figure S7.** Calibration curve of the turbidity of CSPNIPAM28 at 40 °C 650 nm by UV-Vis spectroscopy. The calibration curve was obtained from CSPNIPAM28 aqueous solutions at different concentrations and shifting the temperature above LCST.

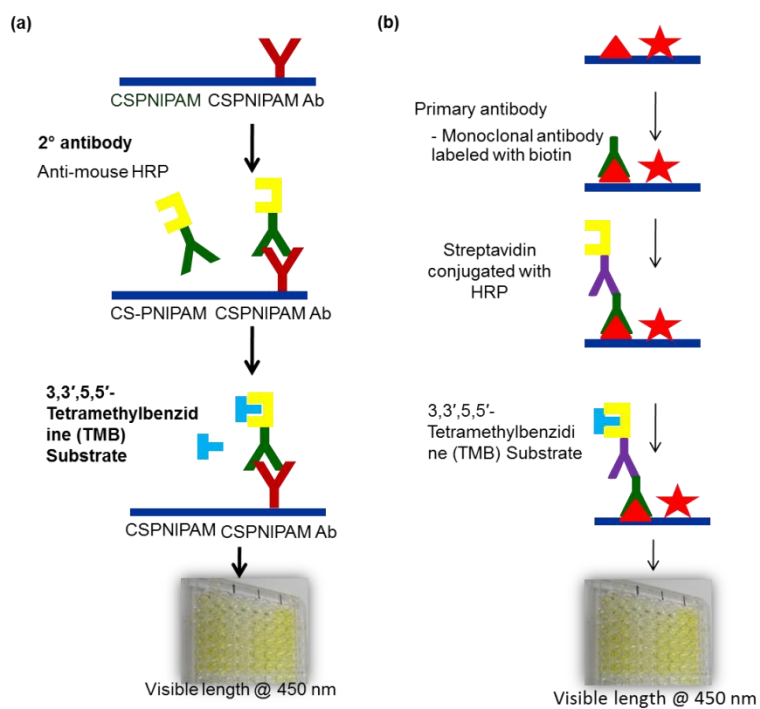

**Figure S8.** Method applied to qualify/quantify of (a) Ab, and (b) Ag.



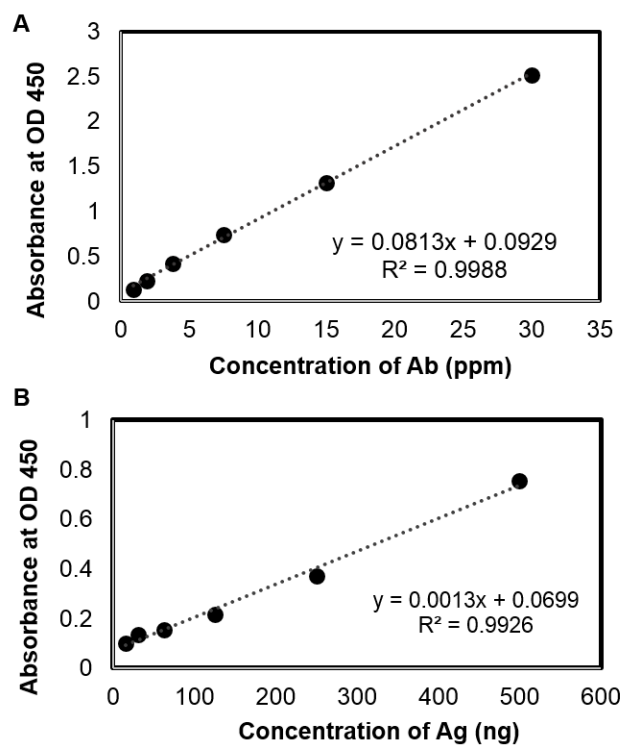

**Figure S9.** Calibration curve for the concentration of (A) antibody, and (B) antigen in aqueous solution.

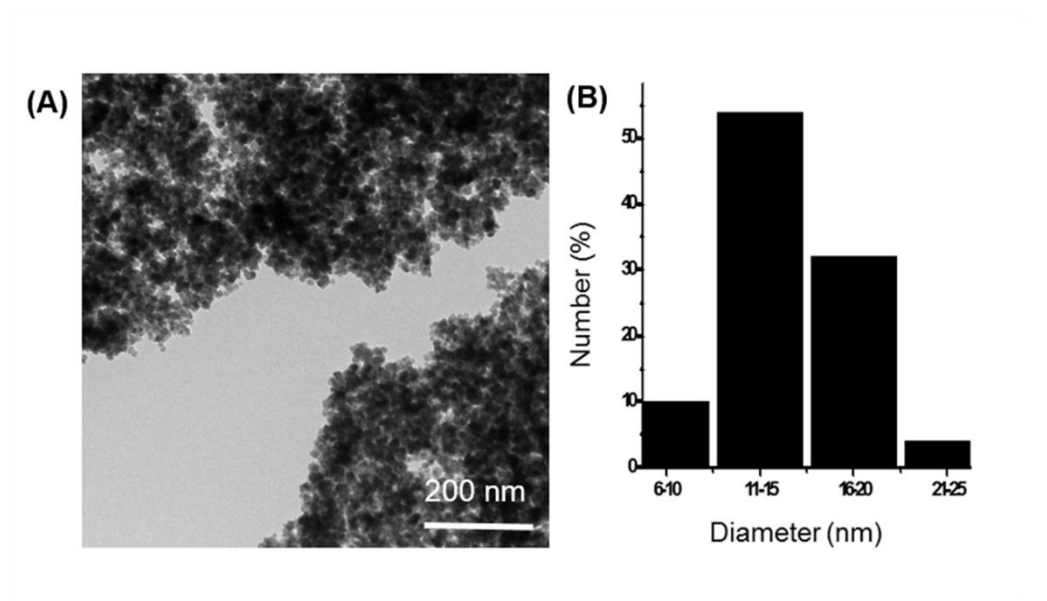

**Figure S10.** (A) Representative TEM images of pristine magnetic nanoparticles. The scale bars is 200 nm, and (B) Histogram of particles size distribution of pristine magnetic nanoparticles as obtained from TEM image.

Movie S1: The entrapment of MAG by using CSPNPAM-Ab-Ag at 40 °C

Movie S2: The release of MAG by using CSPNPAM-Ab-Ag at 6 °C

## REFERENCE

1. Szymanowski, J.; Cox, M.; Hiron, C. G. The Determination of Hydrophilic Lipophilic Balance Values for Some Hydroxyoximes and Their Correlation with Rates of Copper Extraction. *J Chem Technol Biotechnol.* **1984**, 34 (5), 218-226.
